# Supplementary figures and images for: Increased structural disorder of proteins encoded on human sex chromosomes
Source: Royal Society of Chemistry journal article supplement (doi:10.1039/c1mb05285c), 2011-11-22

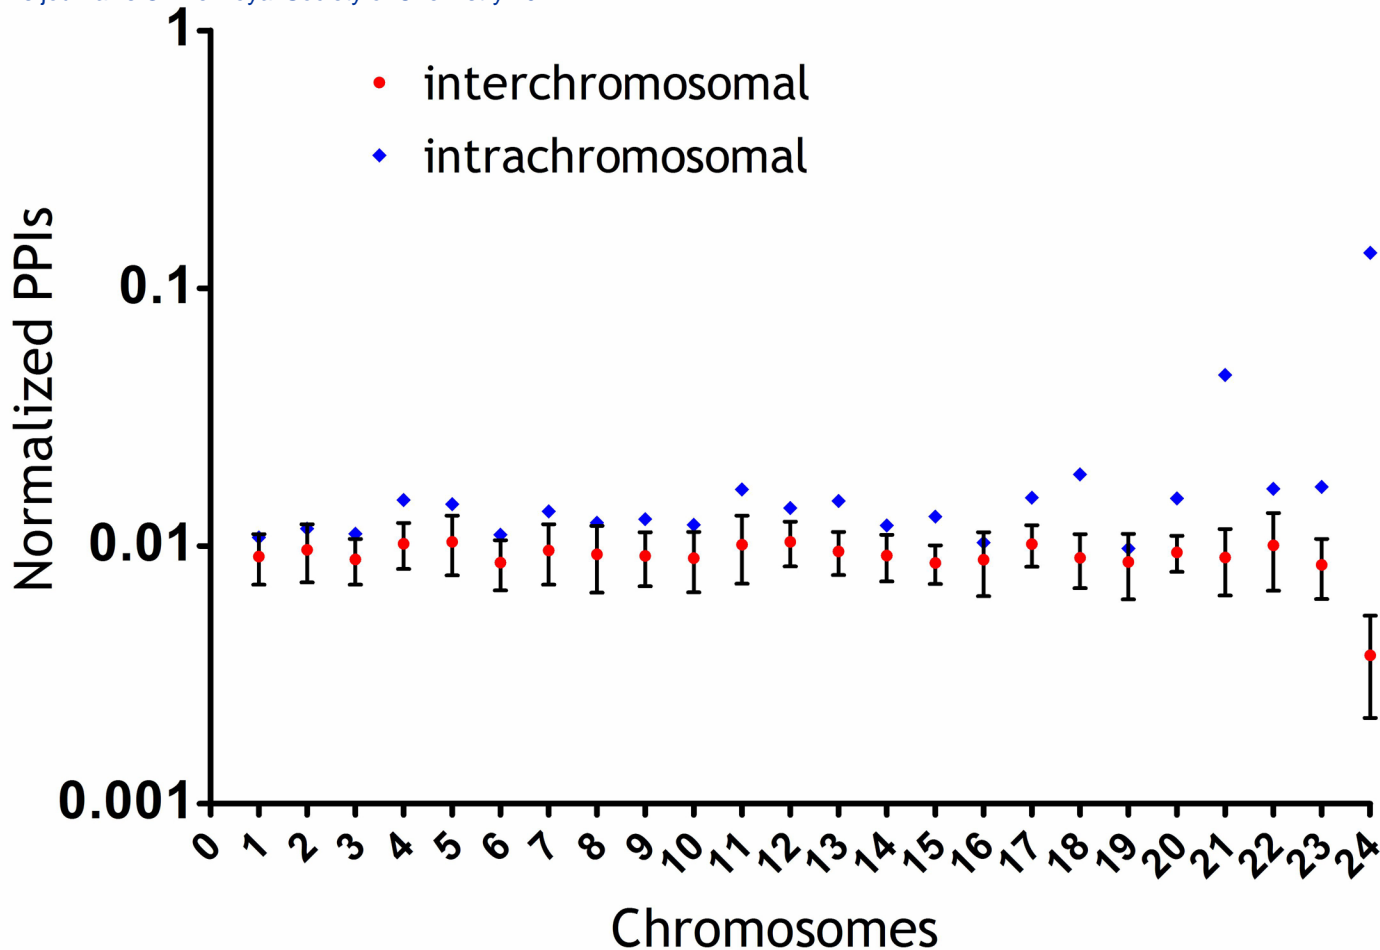

Supplement: c1mb05285c.pdf [file c1mb05285c.pdf]

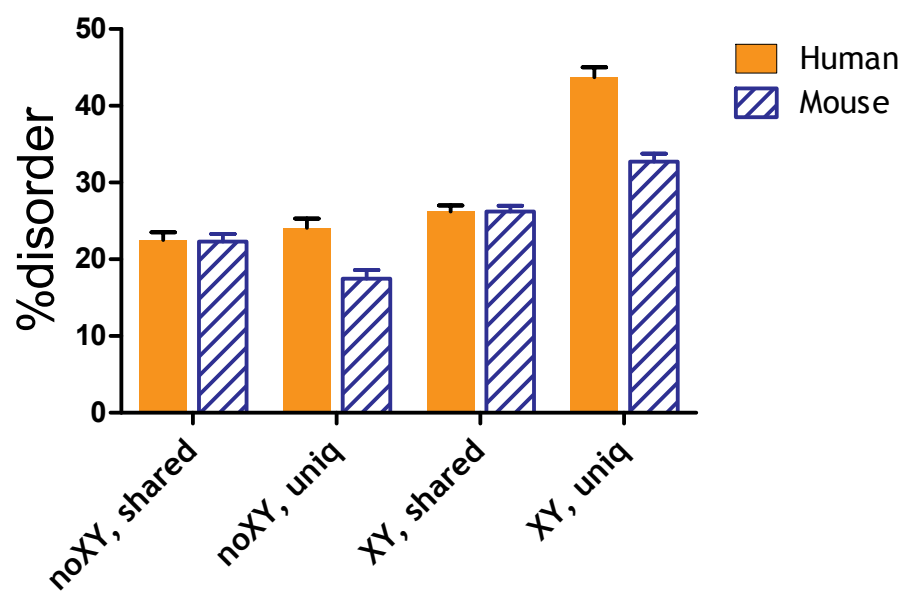

Supplement: c1mb05285c_2.pdf [file c1mb05285c_2.pdf]
